# Supplementary material for: Rapid and efficient mechanosynthesis of alkali and alkaline earth molybdates
Source: Royal Society of Chemistry journal article supplement (doi:10.1039/d4mr00042k), 2024-01-01
Supplement: d4mr00042k1.pdf [file d4mr00042k1.pdf]

### Supplementary Information for:

## “Rapid and Efficient Mechanochemical Synthesis of Alkali and Alkaline Earth Molybdates”

Andres Lara-Contreras, Patrick Julien, Jennifer Scott, and Emily C. Corcoran

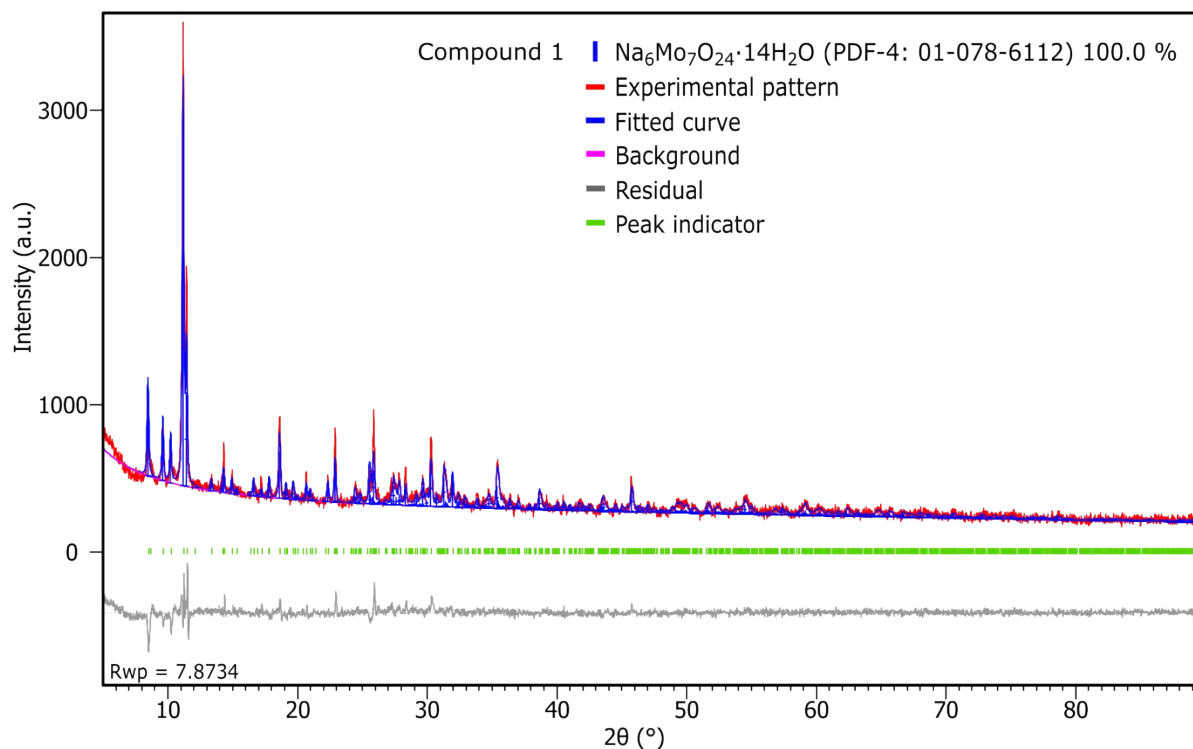

Figure S1. X-ray diffractogram of Compound 1.

Table S1. Statistical parameters of Rietveld refinement of Compound 1.

| Parameter                  | Value     |
|----------------------------|-----------|
| GOF                        | 1.46811   |
| R <sub>p</sub>             | 5.95356   |
| R <sub>WP</sub>            | 7.87341   |
| R <sub>exp</sub>           | 5.36296   |
| d-statistic                | 0.39063   |
| Specimen displacement [mm] | -0.232581 |

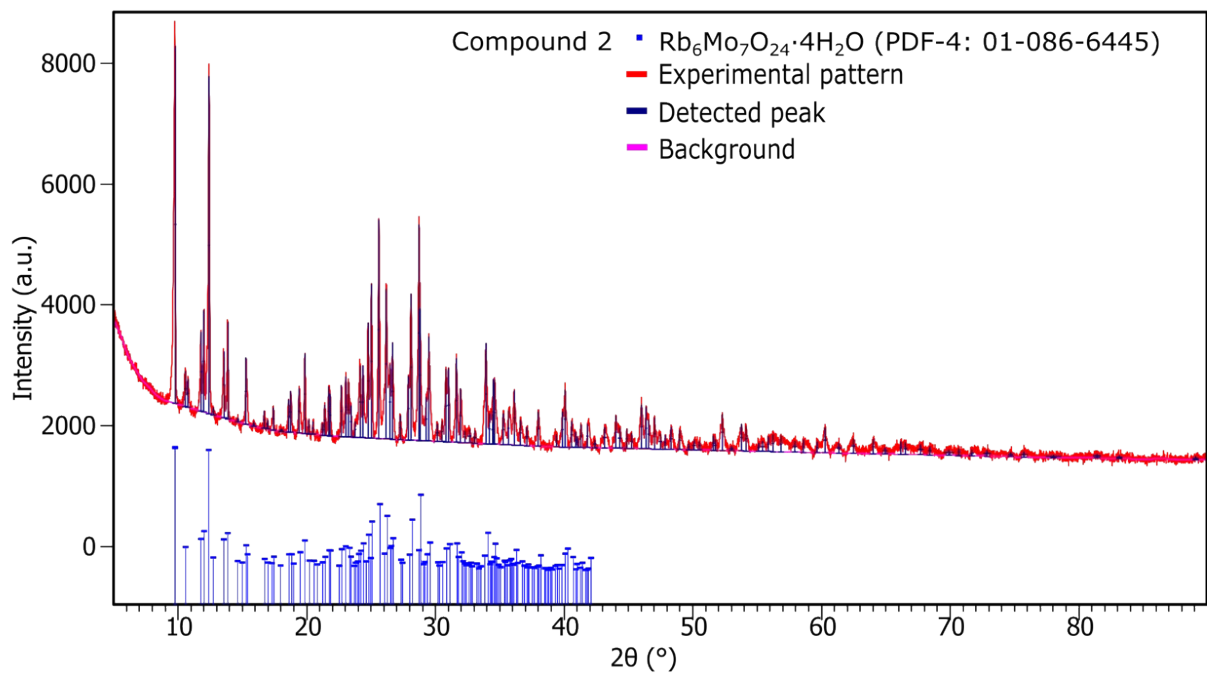

**Figure S2. X-ray diffractogram of Compound 2.**

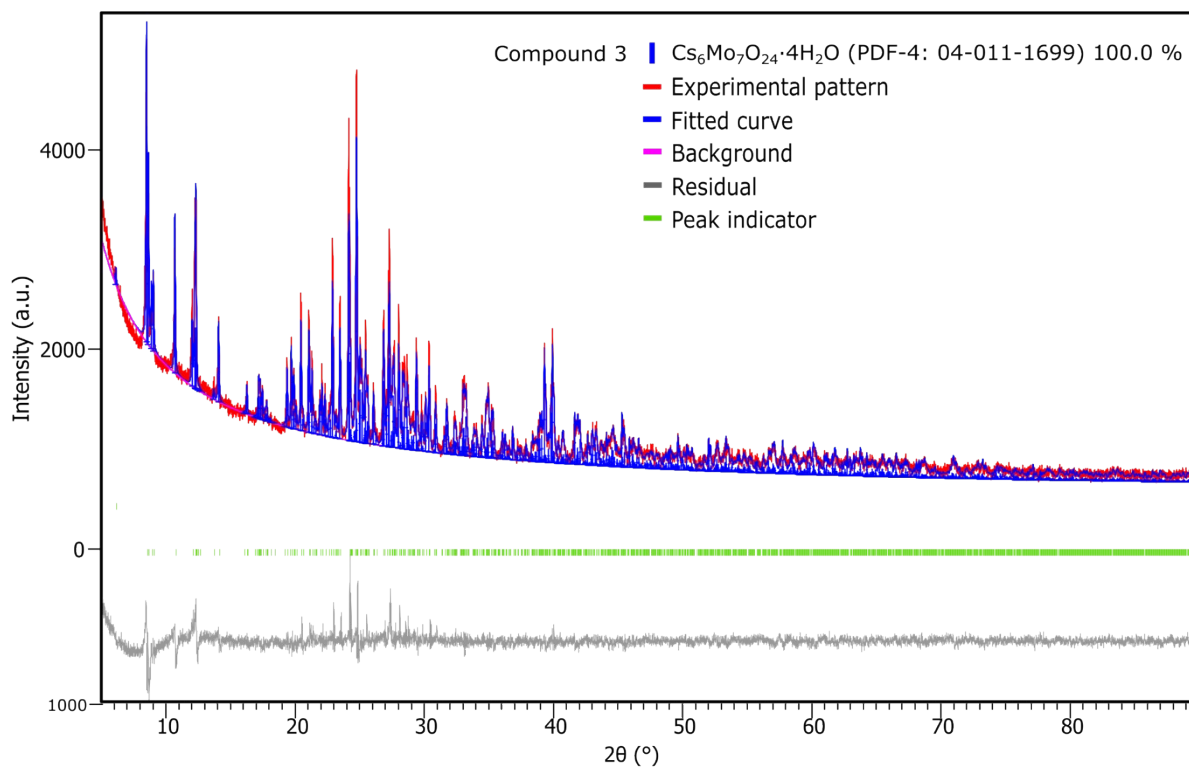

**Figure S3. X-ray diffractogram of Compound 3.**

**Table S2. Statistical parameters of Rietveld refinement of Compound 3.**

| Parameter                | Value            |
|--------------------------|------------------|
| GOF                      | 1.52886          |
| R <sub>p</sub>           | <b>3.38326</b>   |
| R <sub>WP</sub>          | <b>4.45264</b>   |
| R <sub>exp</sub>         | <b>2.91239</b>   |
| d-statistic              | <b>0.35869</b>   |
| Sample displacement [mm] | <b>-0.058716</b> |

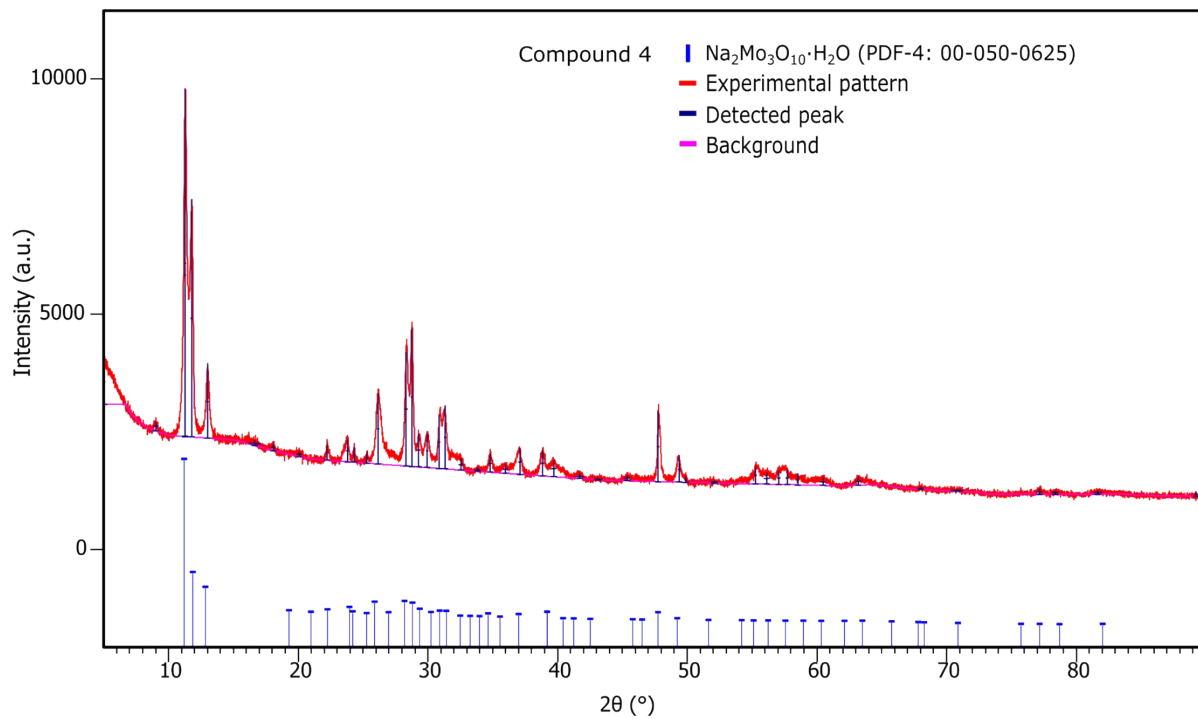

**Figure S4. X-ray diffractogram of Compound 4.**

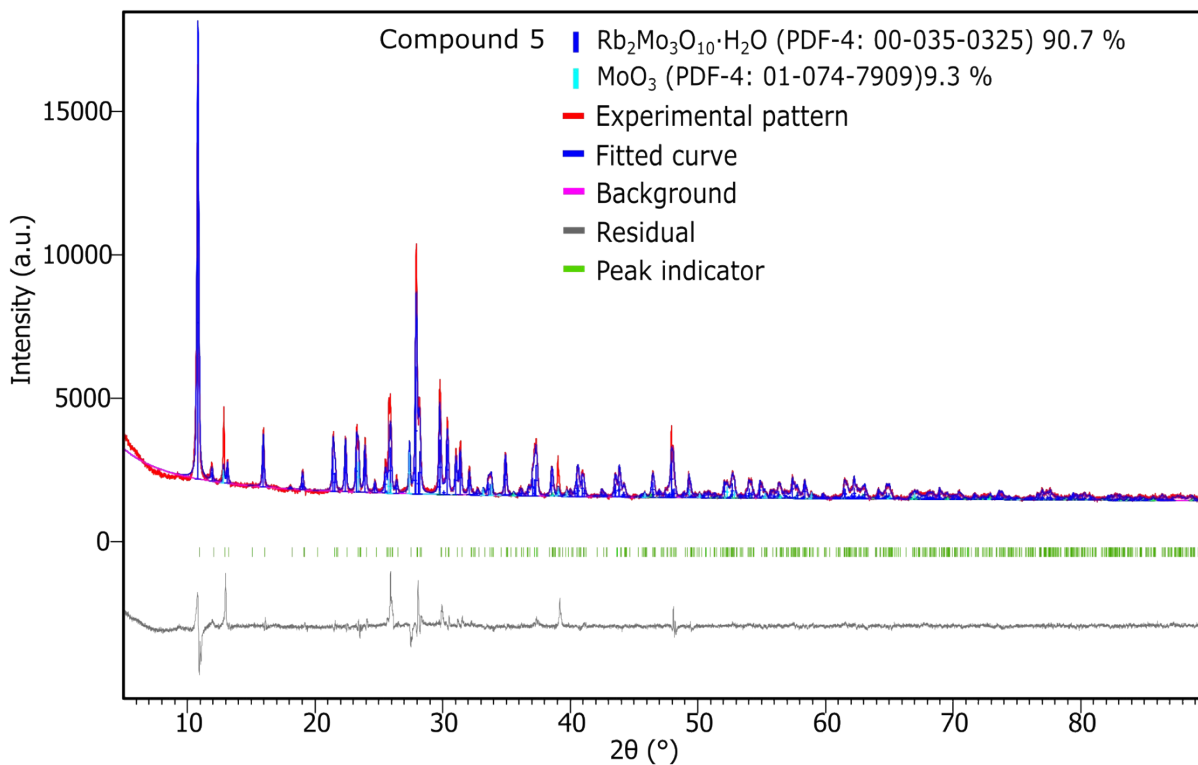

**Figure S5. X-ray diffractogram of Compound 5.**

**Table S3. Statistical parameters of Rietveld refinement of Compound 5.**

| Parameter                | Value     |
|--------------------------|-----------|
| GOF                      | 2.52723   |
| $R_p$                    | 3.60574   |
| $R_{WP}$                 | 5.68455   |
| $R_{exp}$                | 2.24932   |
| d-statistic              | 0.10722   |
| Sample displacement [mm] | -0.124006 |

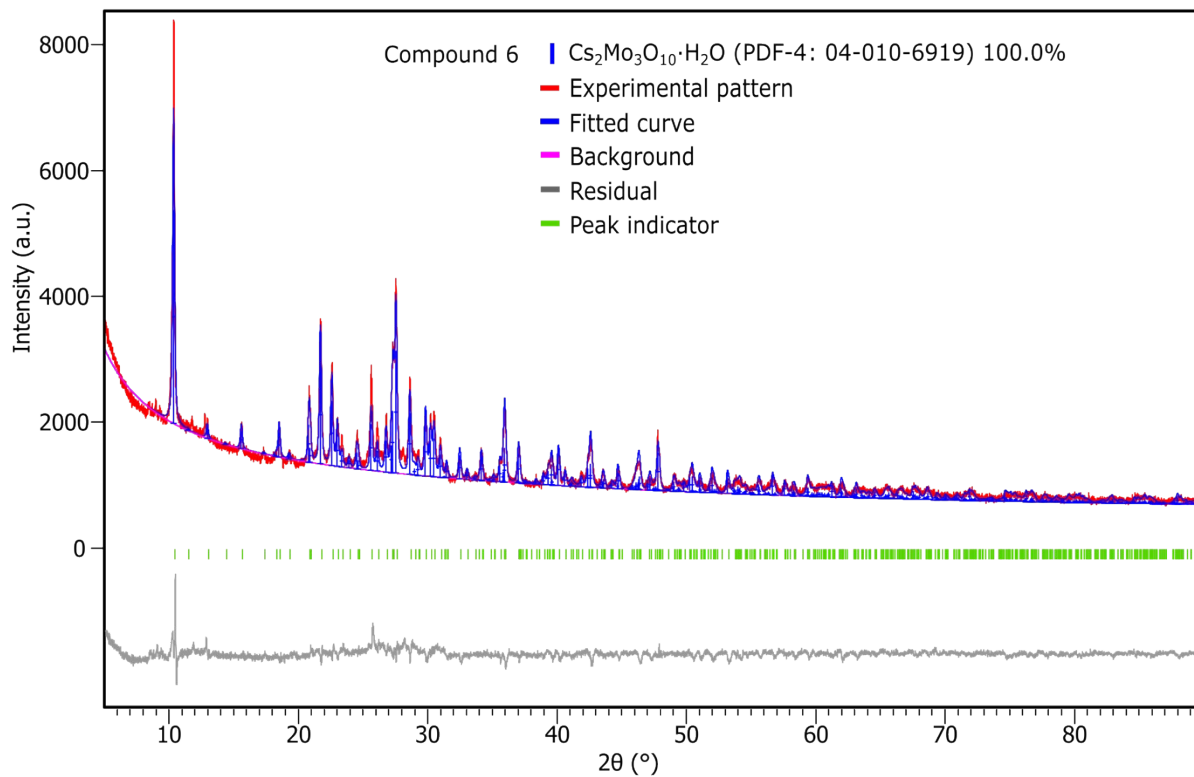

**Figure S6. X-ray diffractogram of Compound 6.**

**Table S4. Statistical parameters of Rietveld refinement of Compound 6.**

| Parameter                | Value           |
|--------------------------|-----------------|
| GOF                      | <b>1.94765</b>  |
| $R_p$                    | <b>4.20985</b>  |
| $R_{WP}$                 | <b>5.45210</b>  |
| $R_{exp}$                | <b>2.79932</b>  |
| d-statistic              | <b>0.21685</b>  |
| Sample displacement [mm] | <b>0.038167</b> |

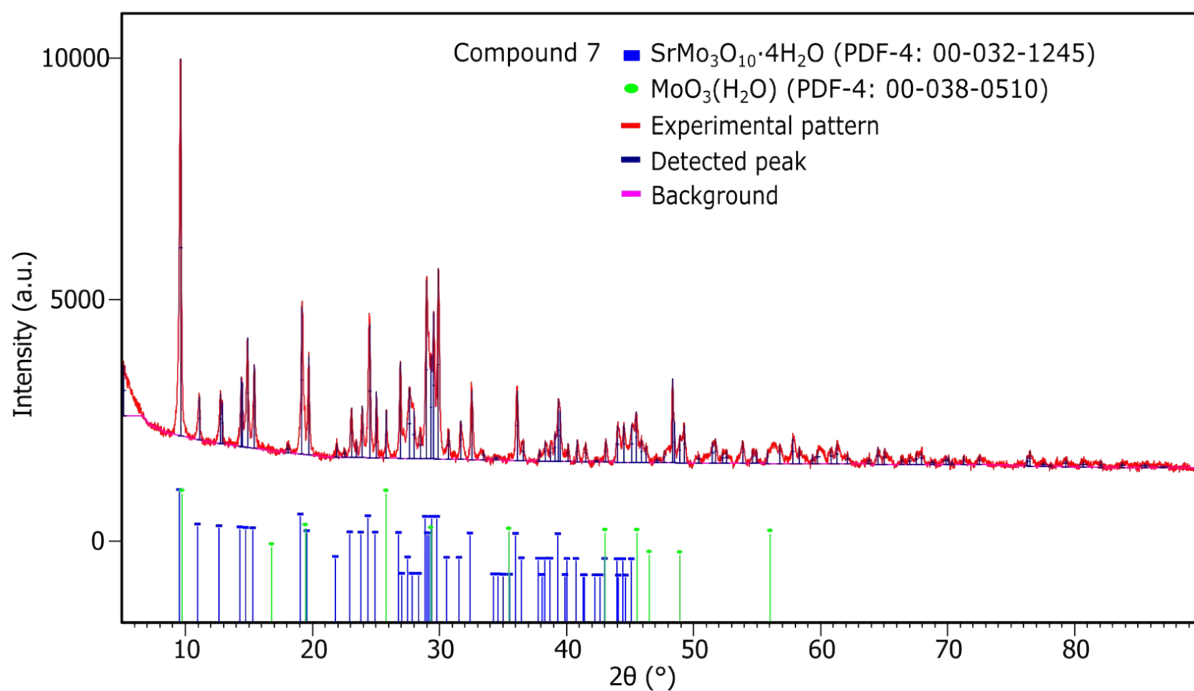

**Figure S7. X-ray diffractogram of Compound 7.**

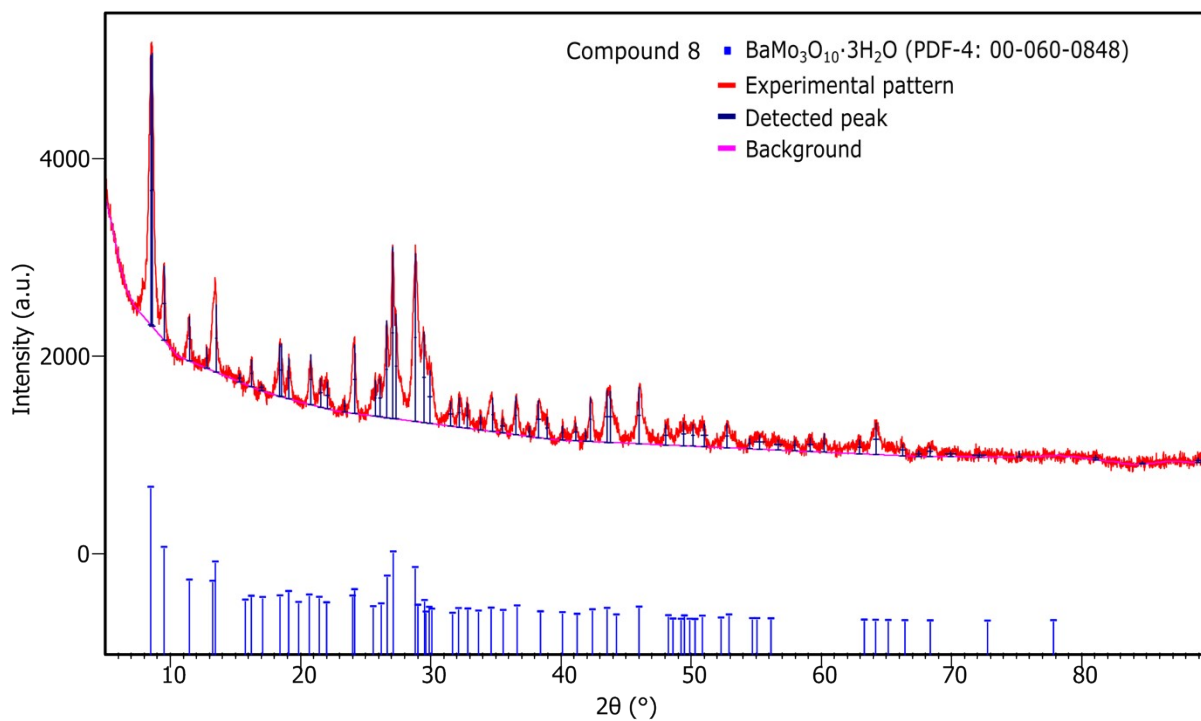

**Figure S8. X-ray diffractogram of Compound 8.**



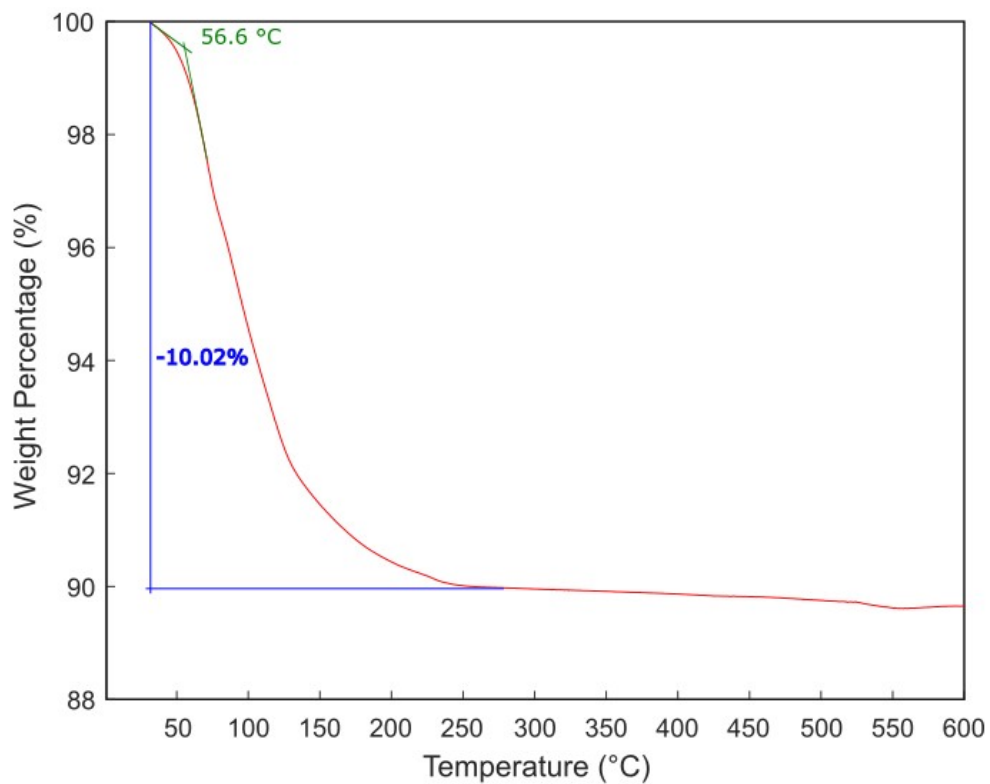

**Figure S9. Thermo-Gravimetric Analysis of Compound 1**

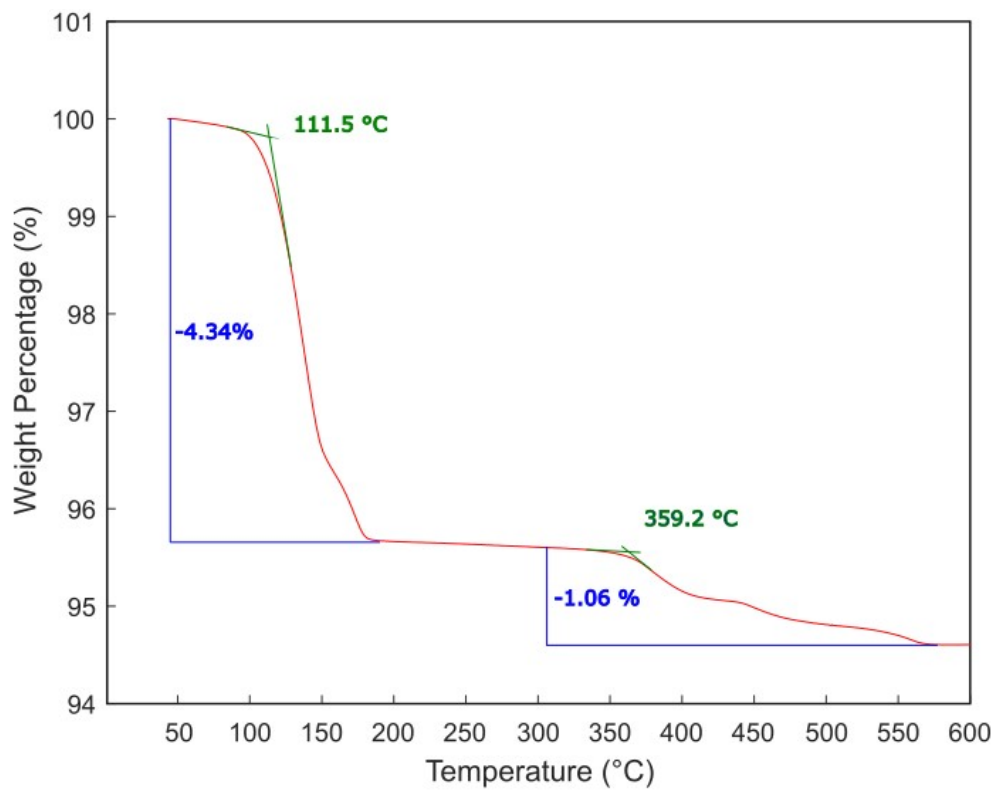

**Figure S10. Thermo-Gravimetric Analysis of Compound 2**

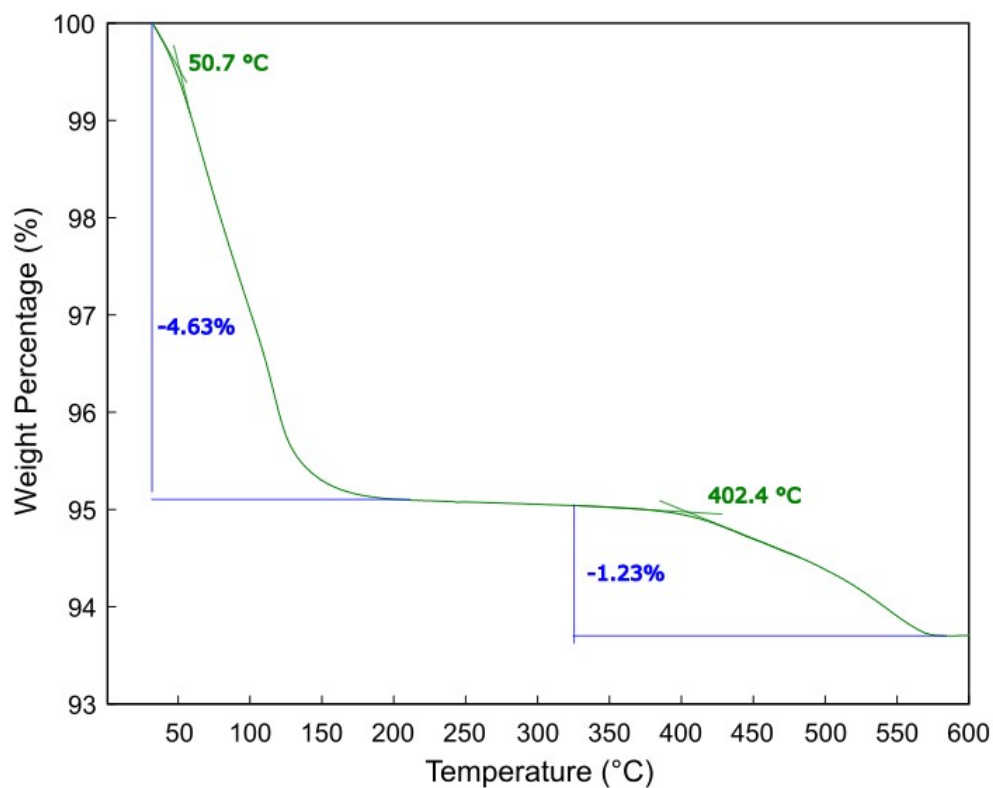

**Figure S11. Thermo-Gravimetric Analysis of Compound 3**

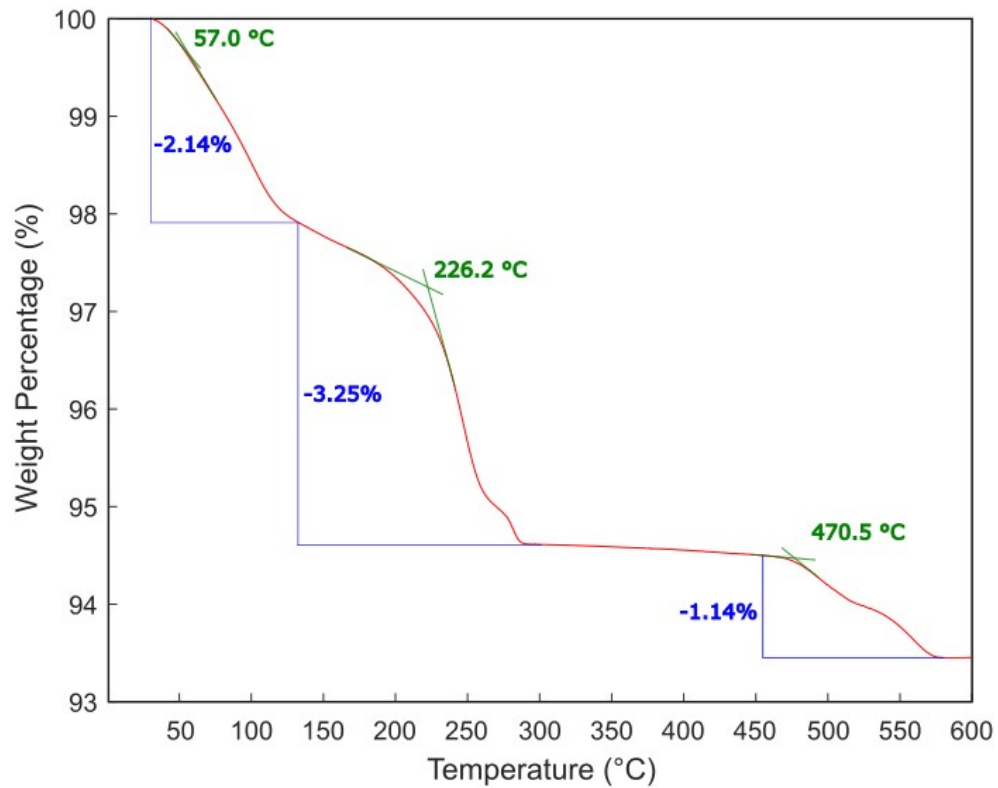

**Figure S12. Thermo-Gravimetric Analysis of Compound 4**

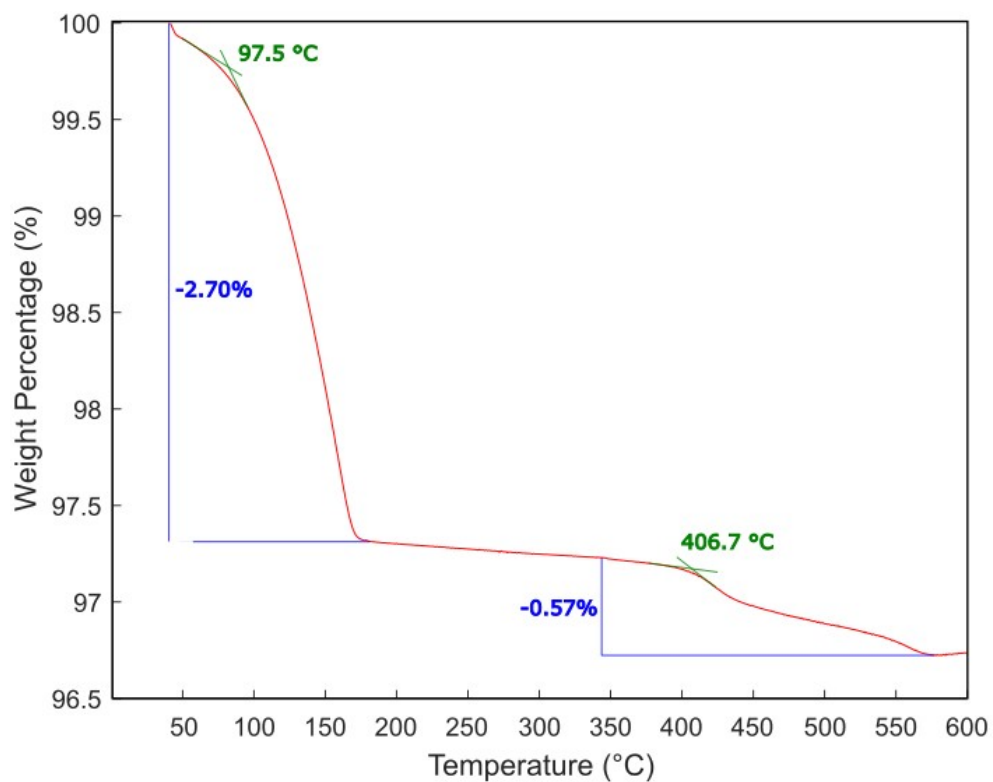

**Figure S13. Thermo-Gravimetric Analysis of Compound 5**

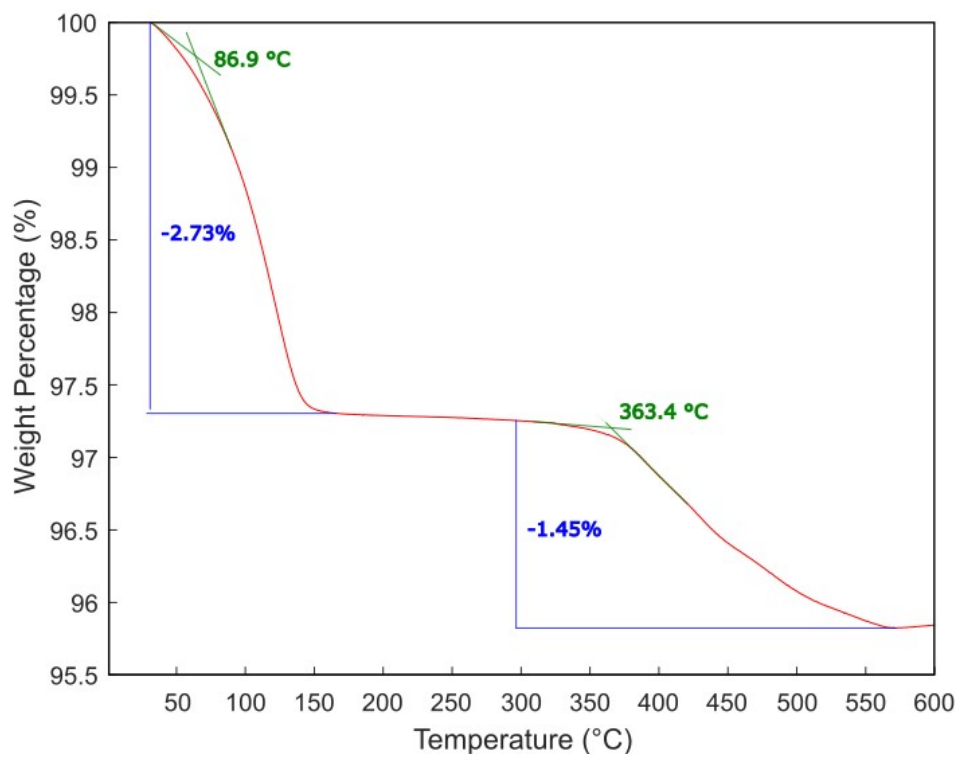

**Figure S14. Thermo-Gravimetric Analysis of Compound 6**

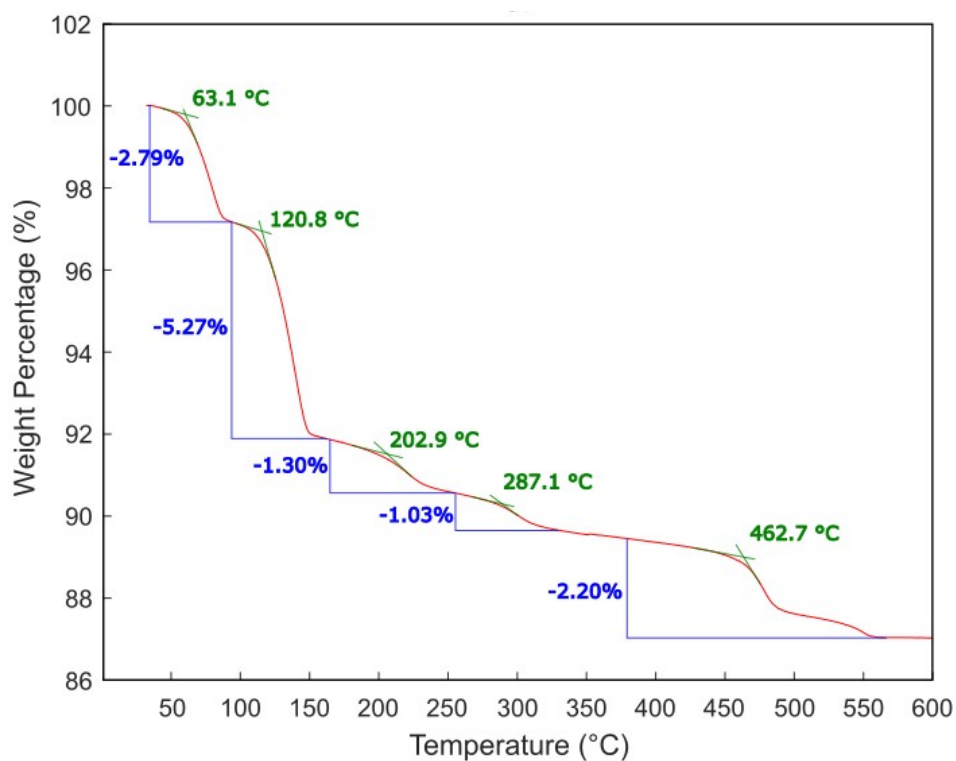

**Figure S15. Thermo-Gravimetric Analysis of Compound 7**

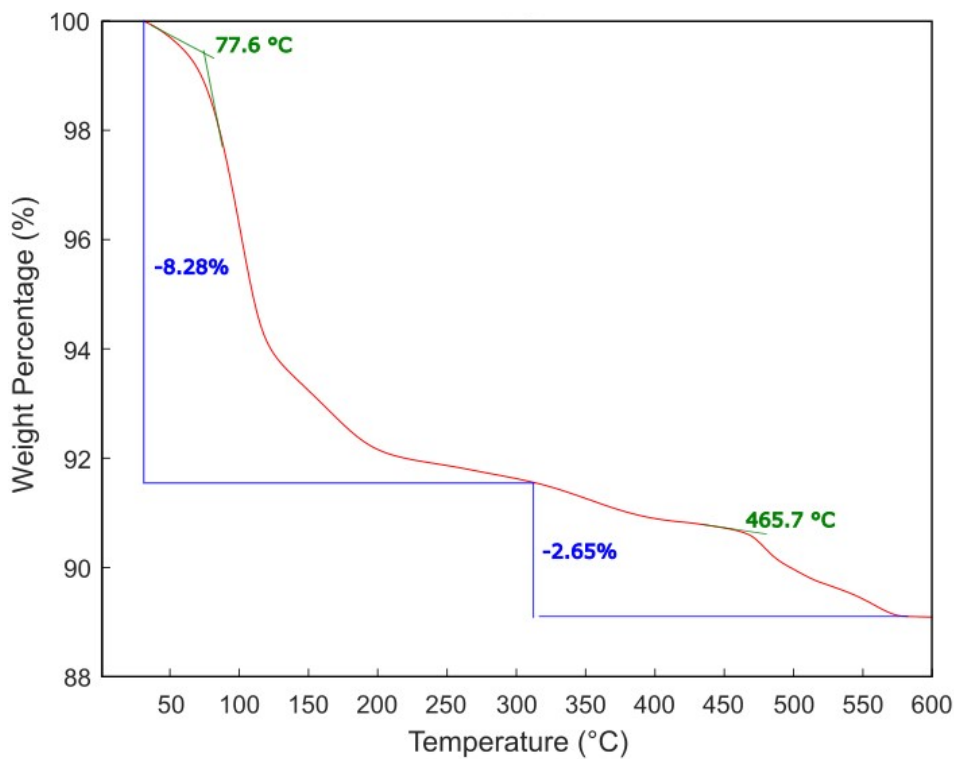

**Figure S16. Thermo-Gravimetric Analysis of Compound 8**

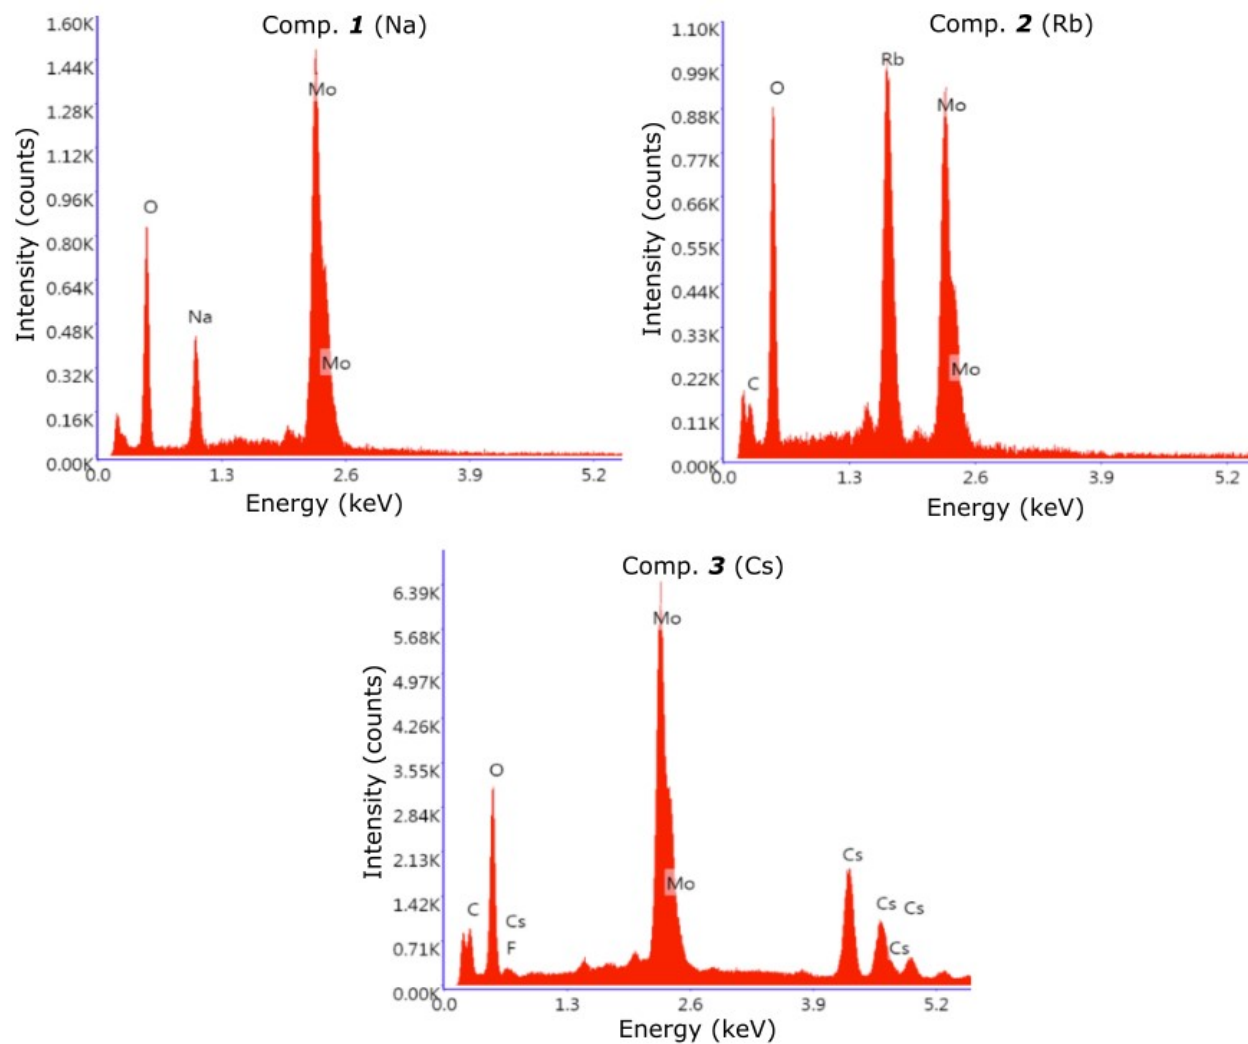

**Figure S17 – Energy Dispersive X-Ray Spectra of Compounds 1-3**

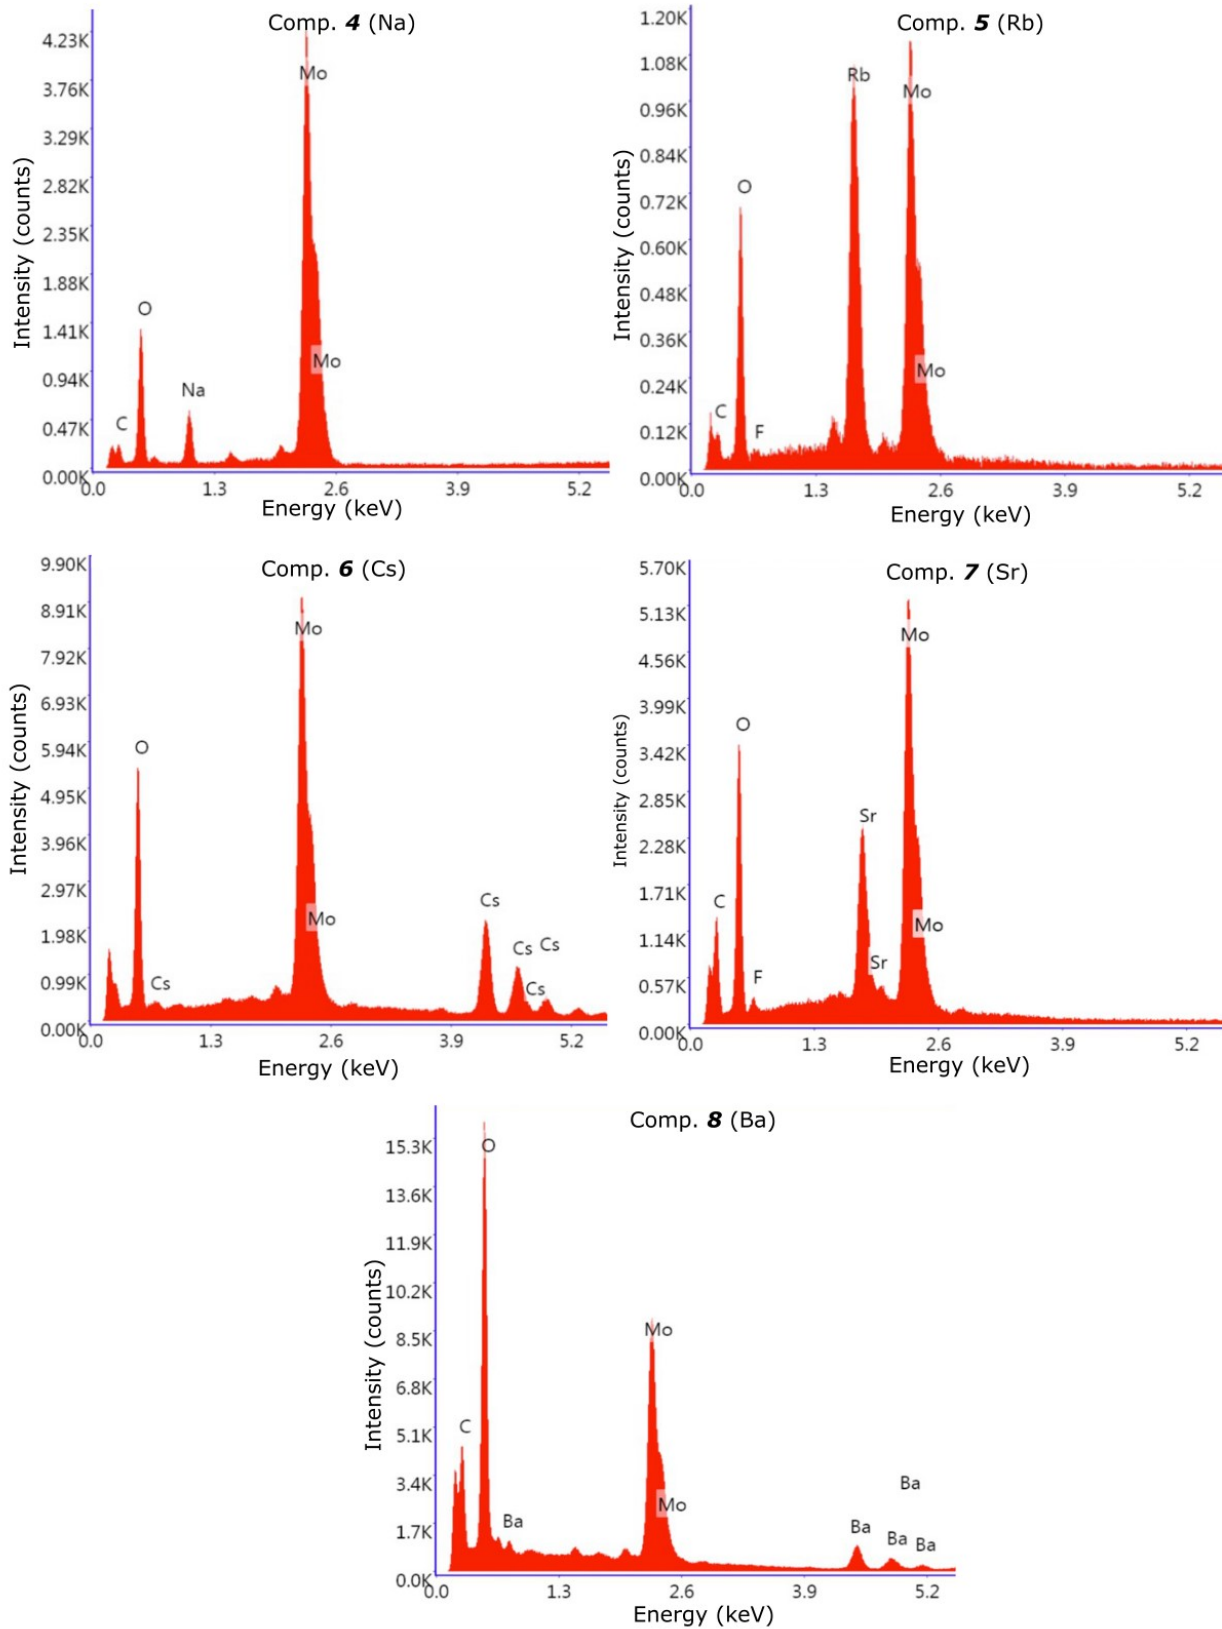

**Figure S18 - Energy Dispersive X-Ray Spectra of Compounds 4 to 8.**
